# Supplementary material
Source: PubMed Central journal article supplement (PMC6900441)
Supplement: NIHMS1534603-supplement-1.pdf [file NIHMS1534603-supplement-1.pdf]

# **In Trauma-exposed Individuals, Self-reported Hyperarousal as Well as Sleep Architecture Predict Resting-state Functional Connectivity in Frontocortical and Paralimbic Regions**

## ***Supplementary Information***

### **Supplementary Methods**

#### *Sleep Disorder Evaluation*

Sleep disorders were evaluated using the Pittsburgh Structured Clinical Interview for Sleep Disorders (SCID-SLD), a widely used (1, 2), but unpublished scale consisting of a 14-page structured interview designed detect the major symptoms of sleep disorders as well as related impairments, medical issues and history based upon the International Classification of Sleep Disorders-2nd Edition (3) and the DSM-IV-TR (4).

#### *Exclusion Criteria*

Subjects were excluded if they had: a history of chronic childhood trauma or PTSD diagnosed prior to index trauma; history of neurological or major medical illness; DSM-IV psychotic, bipolar or autism spectrum disorders; reported sleep disorders other than Insomnia Disorder or detected obstructive sleep apnea (OSA) or periodic limb movement (PLMS) sufficient to warrant referral for treatment; current substance abuse, dependence or positive urine screen; use of anxiolytic or sleep medications; alcohol > 10 drinks/week or caffeine > 5 beverages/d; and MRI contraindications. Stable antidepressant use, mild Axis 1 anxiety disorders, dysthymia and remitted major depressive and substance use

disorders were allowed. A urine toxicology screen was conducted and any participants testing positive for 10 commonly abused substances were excluded.

#### *Calculating the Composite Hyperarousal Index (CHI)*

The CHI was calculated from the 6 Cluster E, hyperarousal items in the Clinician-Administered PTSD Scale for the DSM-5 (CAPS-5) and 6 hyperarousal items from the PTSD Checklist for DSM-5 (PCL-5), questions 15-20. The maximum potential points for each assessments' hyperarousal sections is 24 (0-4 range for each item x 6 items). Hyperarousal scores were converted to a 0-100 scale for both assessments, and then the two converted scores were averaged to get the final CHI. As an example, if a subject had a score of 14 out of 24 for the PCL-5 hyperarousal section, and an 11 out of 24 for the CAPS-5 cluster E section, then their score would be calculated as such:  $[(14/24)*100 + (11/24)*100]/2 = 52.083$  CHI score.

#### *Computation of Sleep Parameters from Evening-Morning Sleep Questionnaire Diary (EMSQ)*

The evening portion of the EMSQ queried prior daytime activities and the time at which the participant began to attempt sleep. Morning portions queried time waking for the day, subjective SOL, subjective TST, and number and duration of nocturnal awakenings (summed as subjective wake time after sleep onset or WASO). Subjective sleep efficiency (SE) was computed from diaries as proportion of time in bed (TIB; duration between the time at which subject began

to attempt sleep and time of waking for the day) occupied by sleep [TIB – (SOL + WASO)].

### *Polysomnographic Montage*

Electrodes were attached in the lab prior to each night of ambulatory PSG using the Somte-PSG ambulatory recorder (Compumedics USA, Inc., Charlotte, NC). The Somte-PSG recorder was contained in a customized cloth pack, worn on the chest, which encloses and protects all loose wires. It was set to begin recording before the subject's earliest anticipated bedtime. The montage included 6 EEG channels (F3, F4, C3, C4, O1, O2) referenced to contralateral mastoids (A1, A2), as well as 2 EOG channels (both outer canthi, above and below the eye), 2 channels of submental EMG, and 2 channels for ECG on the right clavicle and left 5th intercostal space. On the diagnostic night, additional channels for pulse-oximeter, respiration transducer belts, nasal cannula and tibialis channels were added to screen for obstructive sleep apnea (OSA) and period leg movement disorder (PLMD). Data were acquired at 256 Hz, using high and low pass filters of 0.16 and 102 Hz, respectively. All sleep records were scored by the same experienced, RSPGT research polysomnographer. Scoring followed the criteria of the American Academy of Sleep Medicine (5, 6) with 30-second epochs visually differentiated between wake, non-rapid eye movement sleep (N1, N2, N3) and REM sleep stages. The polysomnographer also assessed presence or absence of clinically significant OSA and PLMD.

## Supplementary Results

### *Functional Connectivity of Each Seed to Regions of Anterior Cerebrum*

Table S1 shows functional connectivity of each seed to clusters of contiguous voxels in regions of the anterior cerebrum irrespective of the relationship of such connectivity to symptom- or sleep-related regressors. As explained under the “Methods, rs-fMRI Data Analysis”, to generate the functional connectivity maps, the averaged time series was obtained from each of the 5 fear-related seed regions (bilateral amygdala, bilateral anterior insular cortex, and dorsal anterior cingulate cortex) and 1 fear-regulatory (ventromedial prefrontal cortex) seed region. The correlation analysis was conducted between time series in the seed regions and voxels of the whole brain using the CONN functional connectivity toolbox v.17c (<http://www.nitrc.org/projects/conn>) (7). The correlation coefficient maps were then converted into z-maps by Fisher’s r-to-z transformation to improve normality. In the within-group analyses using SPM for all 74 subjects, these correlation maps were restricted to an anterior cerebral mask and corrected for multiple comparisons within SPM8, using a family-wise error (FWE) correction threshold of  $p < 0.01$  at the whole-brain level.

### *Seed-to-Whole Brain Connectivity and Correlation Analyses*

Table S2 shows results of second-level seed-to-whole brain connectivity analyses thresholded at cluster-defining threshold (CDT)  $p < 0.001$  and a liberal cluster-size threshold of  $\geq 85$  contiguous voxels. All of the results found within the anterior cerebral mask analyses were supported in the seed-to-whole brain

analysis. Additionally, five other posterior regions including the cerebellum, temporal gyrus, brain stem, lingual gyrus, and middle cingulate cortex were found (Table S2). Similarly to analyses of only an anterior cerebral mask, more rigorous analysis using SnPM was performed and the results were thresholded at a cluster-wise threshold of  $p < 0.1$  after family-wise error (FWE) correction with 5000 permutations. None of these new posterior clusters remained significant following the FWE correction using SnPM.

Table S1. The results of resting state functional connectivity of 5 fear-related and 1 emotion regulatory seed regions with anterior cerebral voxel clusters surviving family-wise error (FWE) correction across whole brain thresholded with  $p < 0.01$ .

| Brain regions                       | Coordinates (mm) |     |     | Peak t value | Voxel size |
|-------------------------------------|------------------|-----|-----|--------------|------------|
|                                     | x                | y   | z   |              |            |
| <b>dACC seed region</b>             |                  |     |     |              |            |
| SMA                                 | 2                | 0   | 62  | 8.04         | 1384       |
| rACC                                | 2                | 40  | 10  | 12.39        | 966        |
| Left insula                         | -40              | 4   | 8   | 11.44        | 1565       |
| Right insula                        | 36               | 18  | 8   | 11.92        | 1538       |
| Left thalamus                       | -8               | -16 | 10  | 9.16         | 557        |
| Right thalamus                      | 10               | -14 | 10  | 10.06        | 630        |
| Left putamen                        | -22              | 6   | 10  | 7.34         | 708        |
| Right putamen                       | 24               | 14  | 0   | 7.97         | 821        |
| Left amygdala                       | -22              | -2  | -14 | 6.63         | 105        |
| Right amygdala                      | 28               | 4   | -18 | 6.87         | 57         |
| <b>Left amygdala seed region</b>    |                  |     |     |              |            |
| Left insula                         | -36              | 26  | 6   | 6.66         | 1325       |
| Right insula                        | 46               | 8   | -8  | 7.86         | 461        |
| rACC                                | 2                | 42  | 4   | 6.08         | 259        |
| Left inferior frontal cortex        | -38              | 30  | 6   | 7.90         | 291        |
| Right inferior frontal cortex       | 46               | 34  | 6   | 5.94         | 63         |
| Left putamen                        | -22              | 10  | -2  | 8.27         | 967        |
| Right putamen                       | 34               | 4   | -2  | 7.49         | 497        |
| Right thalamus                      | 10               | -12 | -2  | 8.09         | 97         |
| Right amygdala                      | 28               | 0   | -22 | 17.28        | 248        |
| Left hippocampus                    | -28              | -18 | -14 | 14.27        | 652        |
| Right hippocampus                   | 28               | -10 | -14 | 16.75        | 516        |
| Left temporal pole                  | -40              | 20  | -28 | 10.05        | 1001       |
| Right temporal pole                 | 36               | 20  | -28 | 11.59        | 799        |
| Pons                                | -4               | -22 | -28 | 9.15         | 1603       |
| <b>Right amygdala seed region</b>   |                  |     |     |              |            |
| Right inferior frontal cortex       | 48               | 34  | 12  | 7.12         | 145        |
| Left insula                         | -42              | 2   | 0   | 7.95         | 697        |
| Right insula                        | 46               | 2   | -6  | 7.61         | 661        |
| Left putamen                        | -28              | -2  | 0   | 7.50         | 565        |
| Right putamen                       | 32               | -4  | 0   | 7.55         | 499        |
| vmPFC                               | 2                | 30  | -10 | 7.82         | 256        |
| Left inferior orbito frontal cortex | -36              | 30  | -10 | 7.68         | 258        |
| Left amygdala                       | -22              | -2  | -18 | 21.52        | 220        |
| Left hippocampus                    | -30              | -14 | -18 | 13.74        | 546        |
| Right hippocampus                   | 36               | -10 | -18 | 7.99         | 552        |
| Pons                                | 0                | -18 | -26 | 6.20         | 1114       |
| Left temporal pole                  | -34              | 20  | -26 | 9.57         | 945        |
| Right temporal pole                 | 40               | 20  | -26 | 12.69        | 832        |

| Brain regions                            | Coordinates (mm) |     |     | Peak t value | Voxel size |
|------------------------------------------|------------------|-----|-----|--------------|------------|
|                                          | x                | y   | z   |              |            |
| <b>vmPFC seed region</b>                 |                  |     |     |              |            |
| Left middle frontal cortex               | -28              | 10  | 60  | 6.76         | 104        |
| Left superior medial frontal cortex      | -6               | 54  | 36  | 7.17         | 1028       |
| Right superior medial frontal cortex     | 12               | 54  | 40  | 6.51         | 842        |
| rACC                                     | 4                | 44  | 6   | 6.72         | 479        |
| Left inferior orbito frontal cortex      | -36              | 34  | -16 | 11.07        | 759        |
| Right inferior orbito frontal cortex     | 40               | 36  | -16 | 10.53        | 534        |
| Right temporal pole                      | 40               | 14  | -42 | 6.93         | 140        |
| Middle cingulate cortex                  | 2                | -44 | 34  | 7.10         | 87         |
| <b>Left anterior insula seed region</b>  |                  |     |     |              |            |
| SMA                                      | 6                | 6   | 64  | 9.81         | 1001       |
| Anterior cingulate cortex                | 2                | 34  | 22  | 15.68        | 2033       |
| Right insula                             | 38               | 18  | -10 | 21.09        | 1075       |
| Left putamen                             | -22              | 10  | -6  | 11.82        | 864        |
| Right putamen                            | 28               | 8   | -6  | 10.21        | 506        |
| Left amygdala                            | -18              | -2  | -14 | 9.12         | 197        |
| Right amygdala                           | 26               | 2   | -14 | 7.64         | 74         |
| Pons                                     | 6                | -16 | -28 | 7.18         | 639        |
| Left temporal pole                       | -34              | 18  | -28 | 10.93        | 1046       |
| Right temporal pole                      | 36               | 14  | -28 | 7.53         | 638        |
| <b>Right anterior insula seed region</b> |                  |     |     |              |            |
| SMA                                      | 8                | 8   | 56  | 9.71         | 1050       |
| Right middle frontal cortex              | 42               | 2   | 48  | 7.80         | 158        |
| Anterior cingulate cortex                | 6                | 38  | 18  | 20.18        | 2477       |
| Left insula                              | -40              | 16  | 0   | 19.20        | 1536       |
| Left putamen                             | -24              | 8   | 0   | 8.21         | 771        |
| Right putamen                            | 24               | 12  | 0   | 9.6          | 1016       |
| Left caudate                             | -6               | 14  | 0   | 7.58         | 464        |
| Right caudate                            | 12               | 12  | 0   | 10.77        | 452        |
| Left thalamus                            | -6               | -10 | 0   | 6.67         | 102        |
| Right thalamus                           | 10               | -8  | 0   | 10.89        | 207        |
| Left amygdala                            | -20              | -2  | -12 | 9.36         | 163        |
| Right amygdala                           | 26               | -4  | -12 | 7.24         | 207        |
| Pons                                     | -2               | -20 | -24 | 9.22         | 599        |
| Left temporal pole                       | -34              | 18  | -24 | 9.96         | 840        |
| Right temporal pole                      | 38               | 20  | -24 | 12.70        | 947        |

Abbreviations: dACC – dorsal anterior cingulate cortex; SMA – supplementary motor areas; rACC – rostral anterior cingulate cortex; vmPFC – ventromedial prefrontal cortex.

Table S2. Correlation of posttraumatic symptom, sleep quality and sleep architecture variables with resting state connectivity of 5 fear-related and 1 emotion regulatory seed regions across whole brain thresholded at cluster-defining threshold  $p < 0.001$  and a cluster-size threshold of  $\geq 85$  contiguous voxels.

| Predictor         | Direction | Seed           | Connected regions with seed           | x, y, z<br>(peak voxel) | peak t | k   |
|-------------------|-----------|----------------|---------------------------------------|-------------------------|--------|-----|
| <b>Symptom</b>    |           |                |                                       |                         |        |     |
| PCL-5             | Negative  | right amygdala | right middle frontal cortex (BA9)     | 40,26,24                | 4.33   | 365 |
| CHI               | Negative  | right amygdala | right middle frontal cortex (BA9)     | 40,26,26                | 3.73   | 170 |
| <b>Actigraphy</b> |           |                |                                       |                         |        |     |
| Actigraph TST     | Negative  | left amygdala  | dmPFC (SMA; BA8, 32, 6)               | 2,18,54                 | 4.49   | 417 |
|                   | Negative  | vmPFC          | right middle frontal cortex (BA9, 10) | 30,34,36                | 4.03   | 288 |
|                   | Positive  | vmPFC          | left hippocampus                      | -20,-12,-20             | 4.02   | 313 |
|                   | Negative  | left amygdala  | right middle frontal cortex (BA10)    | 38,50,20                | 3.73   | 173 |
|                   | Positive  | vmPFC          | right hippocampus                     | 24,-12,-20              | 3.85   | 161 |
|                   | Negative  | left amygdala  | left cerebellum                       | -36,-50,-42             | 4.01   | 90  |
|                   | Positive  | left amygdala  | right middle temporal gyrus           | 36,-54,4                | 4.15   | 108 |
|                   | Positive  | vmPFC          | left parahippocampus                  | -32,-24,-24             | 3.83   | 106 |
| Actigraph SOL     | Positive  | dACC           | right posterior insular cortex (BA13) | 42,-10,0                | 4.4    | 292 |
|                   | Positive  | left amygdala  | left insular cortex (BA13)            | -40,6,-8                | 4.14   | 324 |
|                   | Positive  | vmPFC          | right primary motor cortex (BA4)      | 28,-24,64               | 4.26   | 326 |
|                   | Positive  | left AIC       | right middle frontal cortex (BA10)    | 30,52,14                | 3.76   | 233 |
|                   | Positive  | dACC           | left posterior insular cortex (BA13)  | -40,-16,2               | 3.67   | 153 |
|                   | Positive  | left amygdala  | right insular cortex (BA13)           | 42,8,-14                | 4.13   | 169 |
|                   | Positive  | dACC           | middle cingulate cortex (BA31)        | -2,-36,48               | 4.09   | 97  |
|                   | Negative  | dACC           | right middle temporal gyrus           | 46,-44,8                | 3.93   | 112 |
|                   | Positive  | left amygdala  | left brainstem                        | -10,-20,-16             | 4.39   | 125 |
|                   | Positive  | left amygdala  | left cerebellum                       | -34,-63,-20             | 3.59   | 85  |
|                   | Negative  | vmPFC          | left cerebellum (posterior)           | -12,-72,-16             | 3.87   | 142 |
|                   | Negative  | vmPFC          | left cerebellum (anterior)            | -28,-54,-28             | 4.03   | 141 |
|                   | Negative  | left AIC       | left lingual gyrus                    | -2,-90,-4               | 4.28   | 102 |



| Predictor                       | Direction | Seed           | Connected regions with seed           | x, y, z<br>(peak voxel) | peak t | k   |
|---------------------------------|-----------|----------------|---------------------------------------|-------------------------|--------|-----|
| Actigraph SE                    | Negative  | vmPFC          | SMA (BA6)                             | 2,-16,72                | 4.52   | 636 |
| <b>Diary</b>                    |           |                |                                       |                         |        |     |
| Diary TST                       | Negative  | left AIC       | subgenual ACC (BA25)                  | 6,12,-12                | 3.87   | 135 |
|                                 | Positive  | dACC           | rACC (BA24)                           | 0,30,18                 | 3.95   | 162 |
|                                 | Positive  | left AIC       | left inferior parietal cortex (BA40)  | -52,-44,46              | 4.22   | 112 |
|                                 | Negative  | left AIC       | right middle temporal gyrus (BA22)    | 66,-52,8                | 3.72   | 96  |
|                                 | Positive  | dACC           | left superior temporal gyrus          | -40,-16,-12             | 4.32   | 99  |
| Diary SOL                       | Positive  | right AIC      | pre-SMA (BA8, 6, 9)                   | -2,42,52                | 4.48   | 492 |
|                                 | Positive  | right AIC      | left temporal pole (BA38, 21)         | -42,18,-26              | 3.84   | 276 |
| Nightmare and<br>Bad dream rate | Positive  | dACC           | rACC (BA24)                           | 10,32,-8                | 4.89   | 309 |
|                                 | Positive  | left amygdala  | left primary motor cortex (BA6, 4, 9) | -56,0,30                | 4.97   | 305 |
|                                 | Negative  | left AIC       | left orbitofrontal cortex (BA47)      | -48,28,4                | 3.81   | 157 |
|                                 | Positive  | vmPFC          | SMA (BA6)                             | 8,-8,70                 | 3.87   | 133 |
|                                 | Positive  | vmPFC          | left postcentral gyrus                | -26,-38,52              | 3.83   | 111 |
|                                 | Positive  | vmPFC          | right superior temporal gyrus         | 62,-24,-4               | 3.73   | 91  |
|                                 | Positive  | vmPFC          | right hippocampus                     | 30,-28,-10              | 4.77   | 91  |
| <b>PSG</b>                      |           |                |                                       |                         |        |     |
| SWS%                            | Positive  | right amygdala | dmPFC (BA8, 9)                        | -6,28,50                | 5.21   | 643 |
|                                 | Positive  | right amygdala | rACC (BA32)                           | 8,44,8                  | 4.14   | 218 |
|                                 | Positive  | right amygdala | middle cingulate cortex (BA24)        | 2,-20,36                | 4.17   | 98  |

Abbreviations: PCL-5 – PTSD Checklist for DSM-5; CHI – composite hyperarousal index; BA – Brodmann area; TST – total sleep time; dmPFC – dorsomedial prefrontal cortex; SMA – supplementary motor areas; vmPFC – ventromedial prefrontal cortex; SOL – sleep onset latency; dACC – dorsal anterior cingulate cortex; AIC – anterior insular cortex; SE – sleep efficiency; rACC – rostral anterior cingulate cortex; PSG – polysomnography; SWS – slow wave sleep.

Table S3. Correlation between selected independent variables and functional connectivity scores using simple linear regression test.

| Variables                           | R <sup>2</sup> | β      | SE     | Partial R value | p        | Bonferroni-corrected critical p-value |
|-------------------------------------|----------------|--------|--------|-----------------|----------|---------------------------------------|
| <b>PCL-5</b>                        |                |        |        |                 |          |                                       |
| R. amygdala seed – R. MFC           | 0.252          | -0.003 | 0.001  | -0.46           | 0.000054 | <0.05                                 |
| <b>CHI</b>                          |                |        |        |                 |          |                                       |
| R. amygdala seed – R. MFC           | 0.2            | -0.003 | 0.001  | -0.459          | 0.000039 | <0.05                                 |
| <b>Actigraph TST</b>                |                |        |        |                 |          |                                       |
| L. amygdala seed – dmPFC            | 0.246          | -0.001 | 0.0002 | -0.507          | 0.000009 | <0.01                                 |
| vmPFC seed – R. MFC                 | 0.179          | -0.001 | 0.0003 | -0.438          | 0.0001   | <0.01                                 |
| vmPFC seed – L. hippocampus         | 0.289          | 0.001  | 0.0001 | 0.547           | 0.000001 | <0.01                                 |
| L. amygdala seed – R. MFC           | 0.2            | -0.001 | 0.0002 | -0.46           | 0.000071 | <0.01                                 |
| vmPFC seed – R. hippocampus         | 0.237          | 0.001  | 0.0002 | 0.499           | 0.00001  | <0.01                                 |
| <b>Actigraph SOL</b>                |                |        |        |                 |          |                                       |
| dACC seed – R. PIC                  | 0.182          | 0.003  | 0.001  | 0.441           | 0.0001   | <0.0083                               |
| L. amygdala seed – L. IC            | 0.25           | 0.003  | 0.001  | 0.511           | 0.00001  | <0.0083                               |
| vmPFC seed – R. M1                  | 0.239          | 0.003  | 0.001  | 0.501           | 0.000014 | <0.0083                               |
| L. AIC seed – R. MFC                | 0.139          | 0.002  | 0.001  | 0.389           | 0.001    | <0.0083                               |
| dACC seed – L. PIC                  | 0.125          | 0.003  | 0.001  | 0.371           | 0.002    | <0.0083                               |
| L. amygdala seed – R. IC            |                |        |        | 0.45            | 0.0001   | <0.0083                               |
| <b>Actigraph SE</b>                 |                |        |        |                 |          |                                       |
| vmPFC seed – SMA                    | 0.249          | -0.013 | 0.003  | -0.51           | 0.000008 | <0.05                                 |
| <b>Diary TST</b>                    |                |        |        |                 |          |                                       |
| L. AIC seed – subgenual ACC         | 0.195          | -0.001 | 0.0002 | -0.455          | 0.000085 | <0.025                                |
| dACC seed – rACC                    | 0.128          | 0.001  | 0.0003 | 0.375           | 0.002    | <0.025                                |
| <b>Diary SOL</b>                    |                |        |        |                 |          |                                       |
| R. AIC seed – pre-SMA               | 0.257          | 0.004  | 0.001  | 0.514           | 0.000005 | <0.025                                |
| R. AIC seed – L. temporal pole      | 0.182          | 0.004  | 0.001  | 0.44            | 0.000172 | <0.025                                |
| <b>Nightmare and Bad dream rate</b> |                |        |        |                 |          |                                       |
| dACC seed – rACC                    | 0.225          | 0.003  | 0.001  | 0.487           | 0.000026 | <0.0125                               |
| L. amygdala seed – L. M1            | 0.282          | 0.003  | 0.001  | 0.541           | 0.000002 | <0.0125                               |
| L. AIC seed – L. OFC                | 0.178          | -0.005 | 0.001  | -0.436          | 0.0001   | <0.0125                               |
| vmPFC seed – SMA                    | 0.198          | 0.004  | 0.001  | 0.458           | 0.000085 | <0.0125                               |
| <b>PSG SWS%</b>                     |                |        |        |                 |          |                                       |
| R. amygdala seed – dmPFC            | 0.263          | 0.005  | 0.001  | 0.525           | 0.000017 | <0.025                                |
| R. amygdala seed – rACC             | 0.149          | 0.005  | 0.002  | 0.404           | 0.001    | <0.025                                |

Abbreviations: R<sup>2</sup> – adjusted R square; β– unstandardized regression coefficient; SE – standard error; PCL-5 – PTSD Checklist for DSM-5; R. – right; MFC – middle frontal

gyrus cortex; CHI – composite hyperarousal index; TST – total sleep time; L. – left; dmPFC – dorsal medial prefrontal cortex; vmPFC – ventromedial prefrontal cortex; SOL – sleep onset latency; dACC – dorsal anterior cingulate cortex; PIC – posterior insular cortex; IC – insular cortex; M1 – primary motor cortex; AIC – anterior insular cortex; SMA – supplementary motor areas; ACC – anterior cingulate cortex; OFC – orbitofrontal cortex; rACC – rostral anterior cingulate cortex.

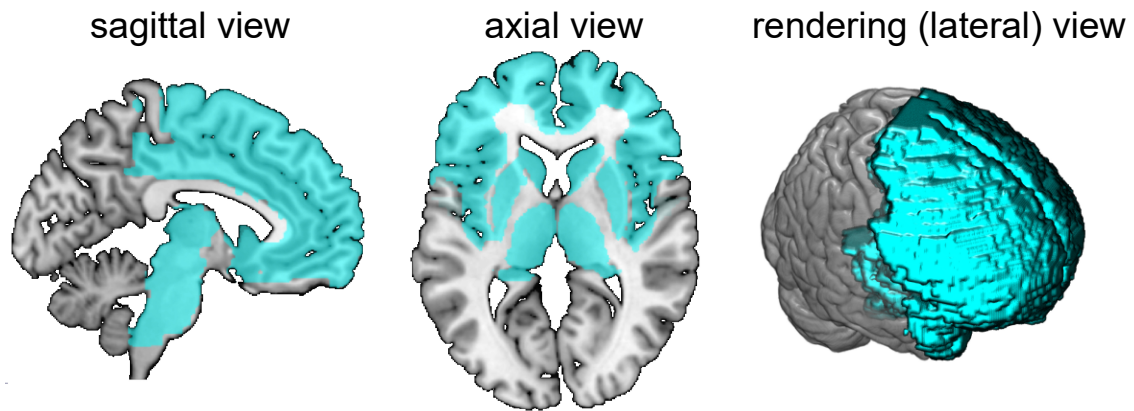

**Figure S1.** Anterior frontocortical/paralimbic mask. To focus on fear-related regions and to obtain higher statistical power, the second level analysis was restricted to this mask which contained: the hippocampus, amygdala, thalamus, basal ganglia, pons, brain stem, midbrain, putamen and caudate as well as Brodmann areas 3-6, 8-11, 13, 21-25, 28, 31-36, 38, 43-47.

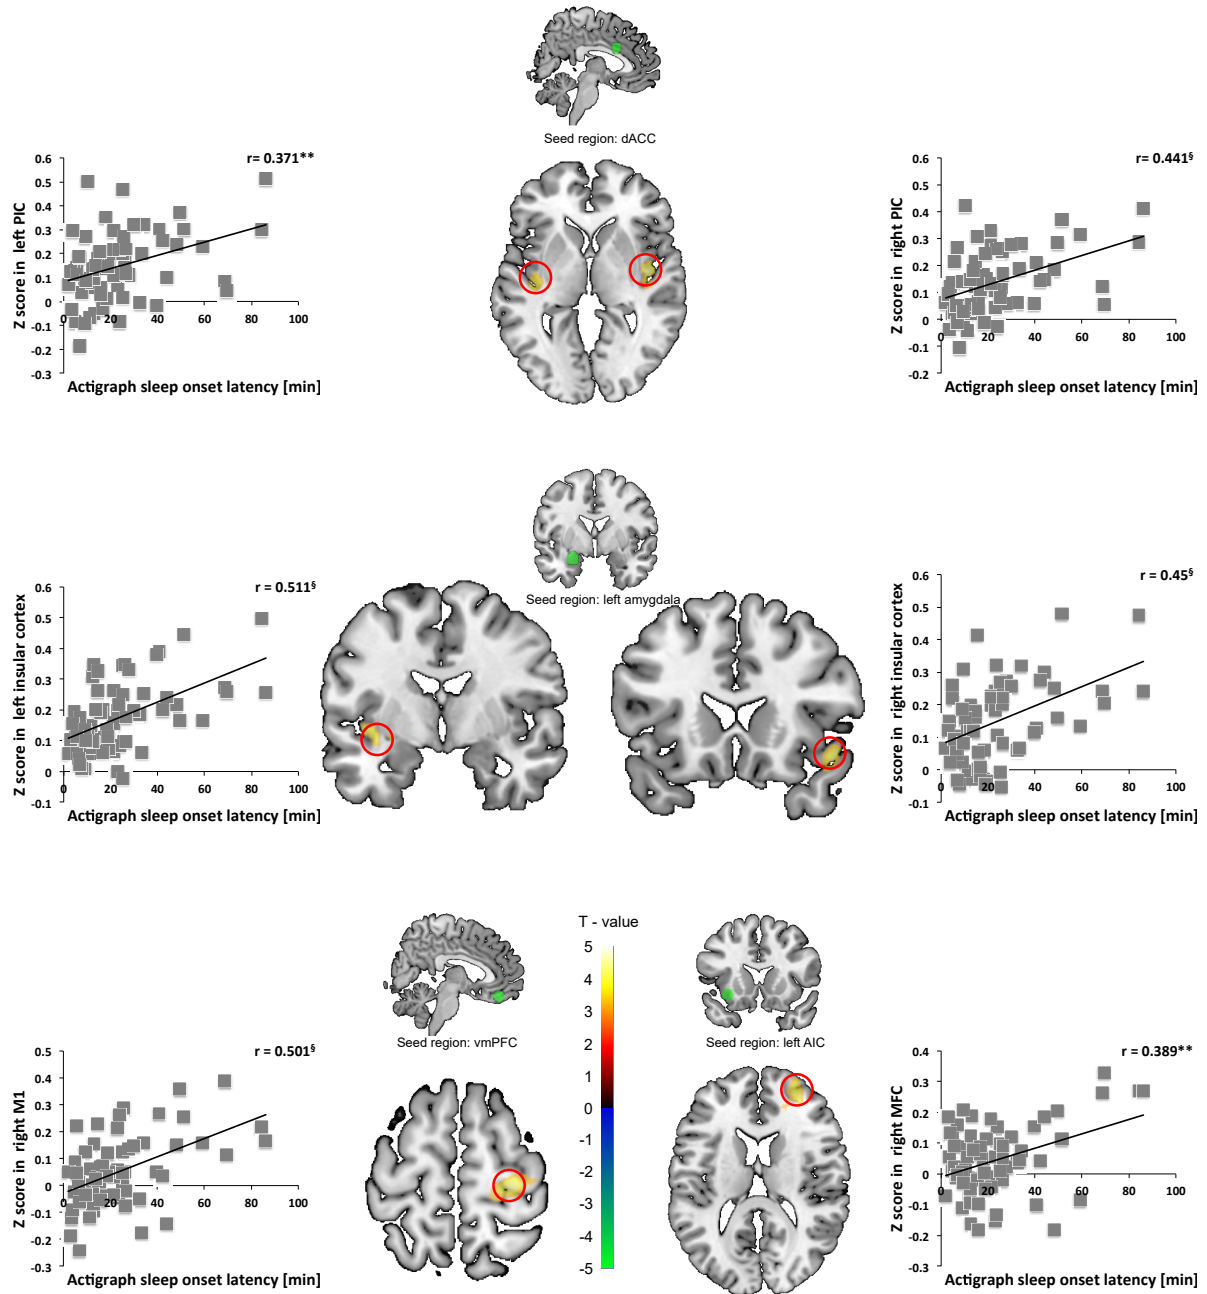

**Figure S2.** Actigraph sleep onset latency (SOL) predicts greater rsFC between the dACC seed and the bilateral posterior insular cortex (PIC) and correlates positively with extracted dACC-PIC mean Z-values (*upper panels*). SOL predicts greater rsFC between the left amygdala seed and the bilateral insular cortex (IC) and correlates positively with extracted amygdala-IC mean Z-values (*middle panels*). SOL predicts greater rsFC between the vmPFC seed and the right primary motor cortex (M1) and correlates positively with extracted vmPFC-M1 mean Z-values (*bottom left panel*). SOL predicts greater rsFC between left AIC seed and the right middle frontal cortex (MFC) and correlates positively with extracted AIC-MFC mean Z-values (*bottom right panel*). \*\*  $p < 0.01$ ;  $\S p < 0.001$ .

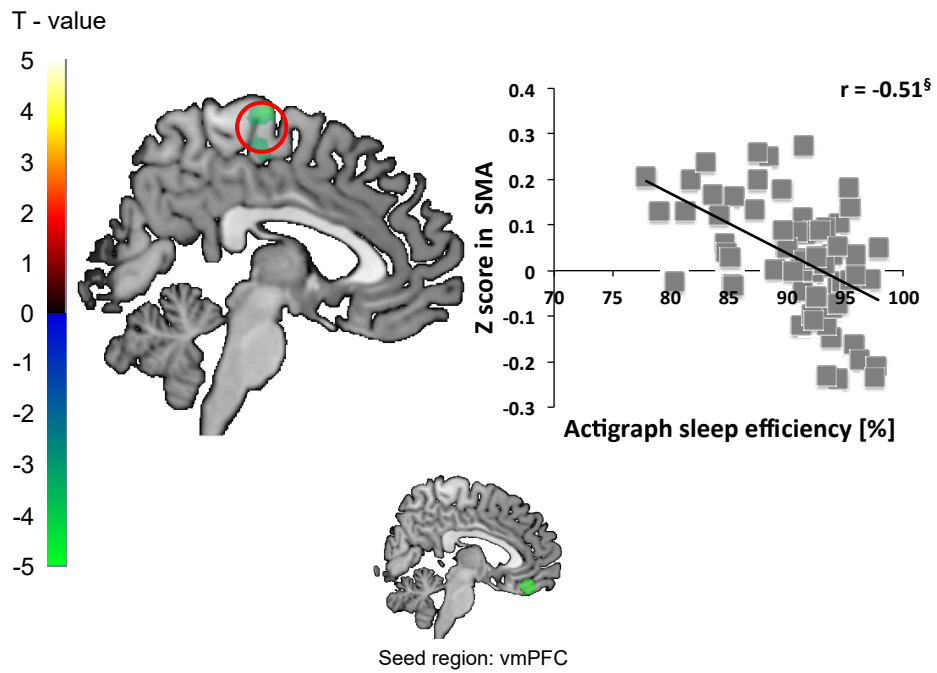

**Figure S3.** Actigraph sleep efficiency (SE) predicts lesser rsFC between the vmPFC seed and the supplementary motor area (SMA) and correlates negatively with extracted vmPFC-SMA mean Z-values.  $^{\S}p < 0.001$ .

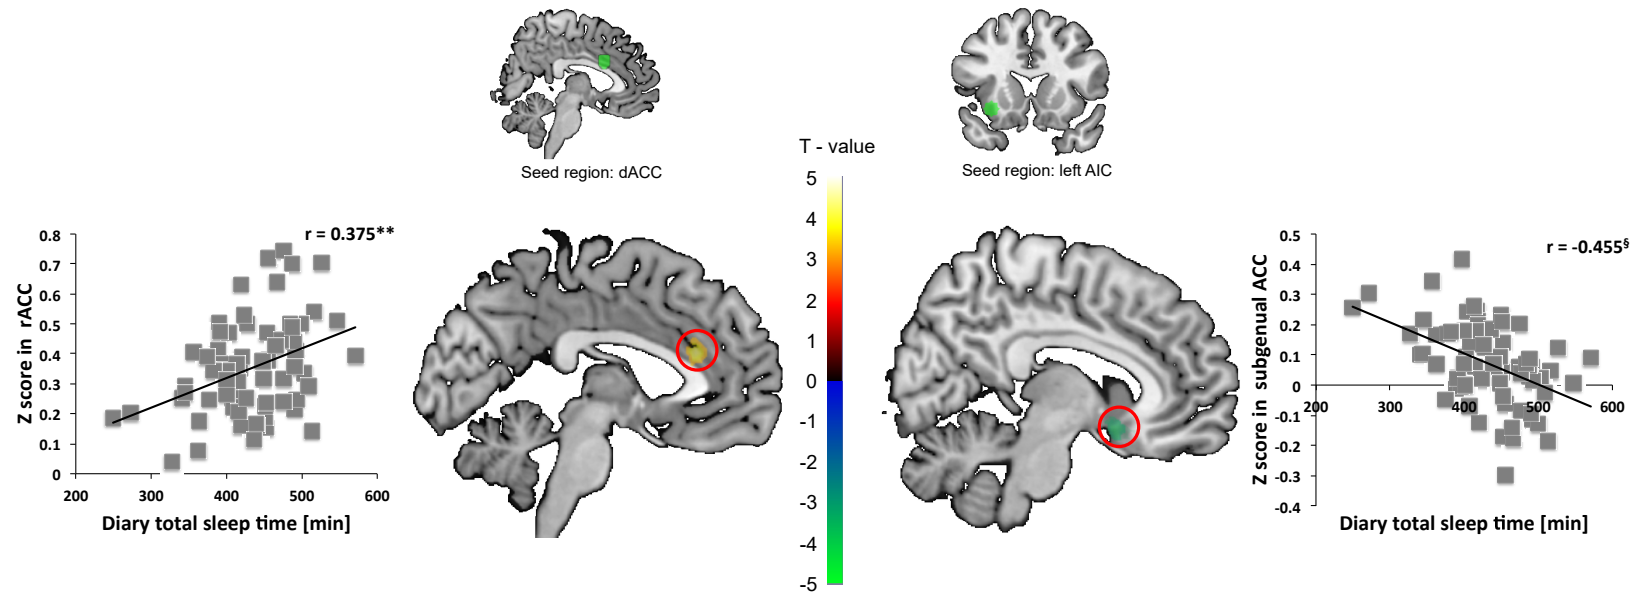

**Figure S4.** Diary total sleep time (TST) predicts greater rsFC between the dACC seed and rostral ACC (rACC) and correlates positively with extracted dACC-rACC mean Z-values (*left panel*). TST predicts lesser rsFC between the left AIC seed and the subgenual ACC (sgACC) and correlates negatively with extracted AIC-sgACC mean Z-values (*right panel*). \*\*  $p < 0.01$ ; §  $p < 0.001$ .

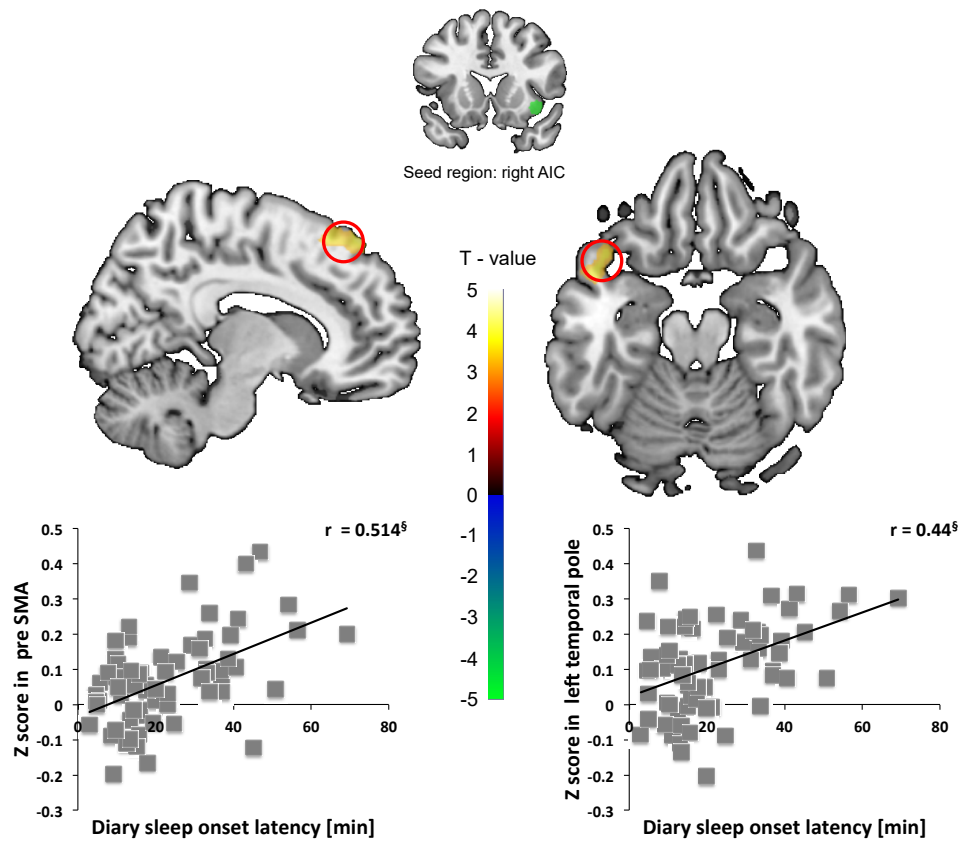

**Figure S5.** Diary sleep onset latency (SOL) predicts greater rsFC between the right AIC seed and the pre-supplementary motor cortex (pre-SMA) and correlates positively with extracted AIC-pre-SMA mean Z-values (*left panel*). SOL predicts more rsFC between the left AIC seed and the left temporal pole and correlates positively with extracted AIC-temporal pole mean Z-values (*right panel*).  $\S$   $p < 0.001$ .



## Supplementary References

1. Insana SP, Hall M, Buysse DJ, Germain A (2013): Validation of the Pittsburgh Sleep Quality Index Addendum for posttraumatic stress disorder (PSQI-A) in U.S. male military veterans. *J Trauma Stress*. 26:192-200.
2. Stocker RPJ, Khan H, Henry L, Germain A (2017): Effects of Sleep Loss on Subjective Complaints and Objective Neurocognitive Performance as Measured by the Immediate Post-Concussion Assessment and Cognitive Testing. *Arch Clin Neuropsychol*. 32:349-368.
3. AASM (2005): *The International Classification of Sleep Disorders, Second Edition (ICSD-2)*. Darien, IL: American Academy of Sleep Medicine.
4. APA (2000): *Diagnostic and Statistical Manual of Mental Disorders DSM-IV-TR Fourth Edition (Text Revision)*. Washington, DC: American Psychiatric Association.
5. Iber C (2007): *The AASM manual for the Scoring of Sleep and Associated Events: Rules Terminology and Technical Specifications*. Westchester, IL: American Academy of Sleep Medicine.
6. Kales A, Rechtschaffen A. (1968): *A manual of standardized terminology, techniques and scoring system for sleep stages of human subjects*. California, LA: Brain Information Service/Brain Research Institute.
7. Whitfield-Gabrieli S, Nieto-Castanon A (2012): Conn: a functional connectivity toolbox for correlated and anticorrelated brain networks. *Brain Connet*. 2:125-141.
